# Supplementary material
Source: publisher figshare collection journal article supplement (https://rs.figshare.com/ndownloader/files/7402003)
Supplement: Supplementary file 1 [file 7402003]

**Table S3**. *Hoya*/*Dischidia* material included in this study, with taxonomic authors, vouchers and their geographic origin, and GenBank accession numbers for all sequences. Herbarium acronyms follow the *Index Herbariorum* (<http://sciweb.nybg.org/science2/IndexHerbariorum.asp>).

| Species | Voucher information | Location | *trnL-F* region (trnL region and trnL-trnF spacer | *atpB-rbcL* spacer |
| --- | --- | --- | --- | --- |
| *Absolmsia spartioides* (Benth.) Kunze (Genus type) D *Hoya spartioides* (Benth.) Kloppenburg | L. Wanntorp 592 (S), Sipitang, Borneo | Borneo, Sipitang | DQ334549 | DQ334591 |
| *Dischidia astephana* Scort. ex King & Gamble | L. Wanntorp 562 (S), Cameroon Highland, Pahang, Malaysia | Malaysia, Pahang, Cameroon Highland | DQ334534 | DQ334576 |
| *Dischidia bengalensis* Colebr. | 920392 (CONN) | - | AF214189; AF214343 | - |
| *Dischidia hirsuta* Decne. | L. Wanntorp 563 (S), | Cultivated, Stockholm University | DQ334531 | DQ334573 |
| *Gunnessia pepo* P.I. Forster (Genus type) | P.I.F. Forster PIF6465 (BRI), Queensland, Australia | Australia, Queensland | DQ334528 | DQ334570 |
| *Hoya affinis* Hemsl. | M. Chase 17128 (K), RBG-Kew, Liv. Coll. 1983-4478 | Cultivated, Royal Botanic Gardens, Kew | DQ334546 | DQ334588 |
| *Hoya albiflora* Zipp. Ex Blume | L. Wanntorp 584 (S), L20000646 | Cultivated | DQ334555 | DQ334597 |
| *Hoya anulata* Schltr. | L. Wanntorp 585 (S), IPPS 8603, L990438 | Cultivated | DQ334550 | DQ334592 |
| *Hoya ariadna* Decne. | M. Chase 17125 (K), RBG-Kew, Liv. Coll. 1983-4474 | Cultivated, Royal Botanic Gardens, Kew | DQ334559 | DQ334602 |
| *Hoya australis* R.Br. ex Traill | L. Wanntorp 564 (S), ex hort Departm. Bot., Stockholm University | Cultivated | DQ334527 | DQ334569 |
| *Hoya australis* 1 R.Br. ex Traill | L. Wanntorp 565 (S), ex hort. Departm. Bot., Stockholm University | Cultivated | DQ334524 | DQ334566 |
| *Hoya bilobata* Schltr | M. Chase 17129 (K), RBG-Kew, Liv. Coll. 1983-4481 | Cultivated, Royal Botanic Gardens, Kew | DQ334554 | DQ334596 |
| *Hoya camphorifolia* Warburg | L. Wanntorp 590 (S), Philippines, Quezon National Park. | Philippines, Quezon National Park | DQ334539 | DQ334581 |
| *Hoya carnosa* R.Br. (Genus type) | L. Wanntorp 566 (S), ex hort. Departm. Bot., Stockholm University | Cultivated | DQ334535 | DQ334577 |
| *Hoya caudata* Hook. f. | L. Wanntorp 587 (S), ex hort, Departm. Bot., Stockholm University | Cultivated | DQ334548 | DQ334590 |
| *Hoya ciliata* Elmer ex C.M.Burton | L. Wanntorp 586 (S), IPPS 3071, L920785 | Cultivated | DQ334562 | DQ334605 |
| *Hoya curtisii* King & Gamble | L. Wanntorp 578 (S), 1998-3180, Uppsala Bot. Gar | Cultivated | DQ334544 | DQ334586 |
| *Hoya* cf. *darwinii* Loher | M. Chase 17135 (K), RBG-Kew, Liv. Coll. 1984-2899 | Cultivated | DQ334542 | DQ334584 |
| *Hoya edeni* King ex Hook.f. | L. Wanntorp 579 (S), IPPS 8292 | Cultivated | DQ334540 | DQ334582 |
| *Hoya gracilis* Schltr. | L. Wanntorp 567 (S), ex hort. Departm. Bot., Stockholm University | Cultivated | DQ334426 | DQ334568 |
| *Hoya heuschkeliana* Kloppenb. | L. Wanntorp 568 (S), ex hort. Departm. Bot., Stockholm University | Cultivated | DQ334529 | DQ334571 |
| *Hoya hypolasia* Schltr. | L. Wanntorp 588 (S), IPPS 7006, L901824 | Cultivated | DQ334538 | DQ334580 |
| *Hoya imbricata* Decne. | L. Wanntorp 569 (S), ex hort. Departm. Bot., Stockholm University | Cultivated | DQ334545 | DQ334587 |
| *Hoya* cf. *incrassata* Elmer ex Merr. | M. Chase 17136 (K), RBG-Kew, Liv. Coll. 1984-3340, Philippines, Palawan | Philippines, Palawan | DQ334561 | DQ334604 |
| *Hoya kentiana* C.M. Burton | L. Wanntorp 570 (S), ex hort. Departm. Bot., Stockholm University | Cultivated | DQ334522 | DQ334564 |
| *Hoya kerrii* Craib | M. Chase 17123 (K), RBG-Kew, Liv. Coll. 1982-2786. | Cultivated, Royal Botanic Gardens, Kew | DQ334533 | DQ334575 |
| *Hoya lacunosa* Blume | L. Wanntorp 571 (S), ex hort. Departm. Bot., Stockholm University | Cultivated | DQ334557 | DQ334599 |
| *Hoya macgillivrayi* F.M.Bailey | L. Wanntorp 572 (S), ex hort. Departm. Bot., Stockholm University | Cultivated | DQ334553 | DQ334595 |
| *Hoya meliflua* Merr. | L. Wanntorp 591 (S), Philippines, Mindoro Occidental, Puerto Galera | Philippines, Mindoro Occidental, Puerto Galera | DQ334525 | DQ334567 |
| *Hoya mitrata* Kerr. | L. Wanntorp 589 (S), IPPS 7684, L914643 | Cultivated | DQ334558 | DQ334600 |
| *Hoya multiflora* Blume | L. Wanntorp 573 (S), ex hort. Departm. Bot., Stockholm University | Cultivated | DQ334552 | DQ334594 |
| *Hoya patella* Schltr. | L. Wanntorp 575 (S), ex hort. Departm. Bot., Stockholm University | Cultivated | DQ334556 | DQ334598 |
| *Hoya pauciflora* Wight | L. Wanntorp 574 (S), ex hort. Departm. Bot., Stockholm University | Cultivated | DQ334536 | DQ334578 |
| *Hoya pseudolittoralis* C. Norman | L. Wanntorp 582 (S), IPPS 4551 | Cultivated | DQ334543 | DQ334585 |
| *Hoya pubicalyx* Merr. | L. Wanntorp 576 (S), ex hort. Departm. Bot., Stockholm University | Cultivated | DQ334530 | DQ334572 |
| *Hoya retusa* Dalz. | L. Wanntorp 580 (S), 1998-3127, Rosendal Uppsala, Uppsala Bot. Gar. | Cultivated | DQ334532 | DQ334574 |
| *Hoya serpens* Hook. f. | M. Chase 17118 (K), RBG-Kew | Cultivated, Royal Botanic Gardens, Kew | DQ334547 | DQ334589 |
| *Hoya telosmoides* R. Omlor | L. Wanntorp 577 (S), Mount Kinabalu, Sabah, Malaya | Malaya, Sabah, Mount Kinabalu | DQ334551 | DQ334593 |
| *Hoya tsangii* C.M. Burton | L. Wanntorp 581 (S), 1998-3136, Uppsala Bot. Gar. | Cultivated | DQ334523 | DQ334565 |
| *Hoya venusta* Schltr. | L. Wanntorp 583 (S), IPPS 3773 | Cultivated | DQ334560 | DQ334603 |
| *Hoya*–Chase 17132 | M. Chase 17132 (K), RBG-Kew, Liv. Coll. 1983–4484 | Cultivated, Royal Botanic Gardens, Kew | DQ334537 | DQ334579 |
| *Madangia inflata* P.I. Forst., D.J. Liddle & I.M. Liddle (Genus type) | I.M. Liddle IML1076 (BRI), Madang Province, New Guinea | New Guinea, Madang Province | DQ334541 | DQ334583 |
| *Marsdenia carvalhoi* G.Morillo & Carnevali | M. Chase 17115 (K), RBG-Kew, Liv. Coll. 1982-1949, Brazil, Bahia. | Brazil, Bahia | DQ334521 | DQ334563 |
| *Micholitzia obcordata* N.E.Br. (Genus type) | Seidenfaden s.n. (K) (MWC 733) |  | AJ431766;  AJ431765 | DQ334601 |
